# Supplementary material for: Disturbance triggers non-linear microbe–environment feedbacks
Source: Copernicus journal article supplement (doi:10.5194/bg-18-4773-2021), 2021-08-24
Supplement: Supplementary file 1 [file bg-18-4773-2021-supplement.zip]

Archive with 3 entries (3 files):
- SI_BGC_Submission_6Aug2021.pdf
- bg-18-4773-2021-supplement-title-page.pdf
- Table_S1_Vial_Mass_Volume_Final.csv
