# Supplementary material for: Disturbance triggers non-linear microbe–environment feedbacks
Source: Copernicus journal article supplement (doi:10.5194/bg-18-4773-2021), 2021-08-24
Supplement: Supplementary file 1 [file bg-18-4773-2021-supplement.zip › bg-18-4773-2021-supplement-title-page.pdf]

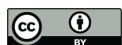

## *Supplement of*

# **Disturbance triggers non-linear microbe–environment feedbacks**

**Aditi Sengupta et al.**

*Correspondence to:* James Stegen ([james.stegen@pnnl.gov](mailto:james.stegen@pnnl.gov))

- [bg-18-4773-2021-supplement-title-page.pdf](#)
- [SI\\_BGC\\_Submission\\_6Aug2021.pdf](#)
- [Table\\_S1\\_Vial\\_Mass\\_Volume\\_Final.csv](#)

The copyright of individual parts of the supplement might differ from the article licence.
